# Supplementary material for: Evaluation of 11 SARS-CoV-2 antibody tests by using samples from patients with defined IgG antibody titers
Source: PubMed Central journal article supplement (PMC8027209; doi:10.1038/s41598-021-87289-6), 2021-04-07
Supplement: 41598_2021_87289_MOESM1_ESM.pdf [file 41598_2021_87289_MOESM1_ESM.pdf]

## **Evaluation of 11 SARS-CoV-2 antibody tests by using samples from patients with defined IgG antibody titers**

Nina Lagerqvist<sup>1#</sup>, Kimia T. Maleki<sup>1,2</sup>, Jenny Verner-Carlsson<sup>1</sup>, Mikaela Olausson<sup>1</sup>, Joakim Dillner<sup>3</sup>, Julia Wigren Byström<sup>4</sup>, Tor Monsen<sup>4</sup>, Mattias Forsell<sup>4</sup>, Jenny Eriksson<sup>5</sup>, Gordana Bogdanovic<sup>6</sup>, Sandra Muschiol<sup>6</sup>, Joel Ljunggren<sup>7</sup>, Johanna Repo<sup>7</sup>, Torbjörn Kjerstadius<sup>8</sup>, Shaman Muradrasoli<sup>1</sup>, Mia Brytting<sup>1</sup>, Åsa Szekely Björndal<sup>1</sup>, Thomas Åkerlund<sup>1</sup>, Charlotta Nilsson<sup>1,3</sup>, and Jonas Klingström<sup>1,2</sup>

<sup>1</sup>Department of Microbiology, Public Health Agency of Sweden, Solna, Sweden

<sup>2</sup>Department of Medicine Huddinge, Karolinska Institutet, Stockholm, Sweden

<sup>3</sup>Department of Laboratory Medicine, Karolinska Institutet, Stockholm, Sweden

<sup>4</sup>Department of Clinical Microbiology, Umeå University, Umeå, Sweden

<sup>5</sup>Region Västmanland, Västerås, Sweden

<sup>6</sup>Karolinska University Hospital, Stockholm, Sweden

<sup>7</sup>Region Västernorrland, County Hospital of Västernorrland, Sundsvall, Sweden

<sup>8</sup>Region Värmland, Centralsjukhuset, Karlstad, Sweden

#Address correspondence to Nina Lagerqvist, [nina.lagerqvist@folkhalsomyndigheten.se](mailto:nina.lagerqvist@folkhalsomyndigheten.se)

## **Supplementary Information**

### **Text**

Bacterial diseases included leptospirosis, tularemia, brucellosis, Q fever, Mediterranean spotted fever, melioidosis, and scrub typhus. Parasitic diseases included malaria and schistosomiasis. Viral diseases included infections with common human coronaviruses, dengue virus, zika virus, West Nile virus, Japanese encephalitis virus, chikungunya virus, and hantavirus causing hemorrhagic fever with renal syndrome.

**Table S1.** Assay characteristics.

| Acronym     | Test                                            | Manufacturer                                                                                                           | Format | Lot no.                                                                | Antibody    | Target       | Specimens                        |
|-------------|-------------------------------------------------|------------------------------------------------------------------------------------------------------------------------|--------|------------------------------------------------------------------------|-------------|--------------|----------------------------------|
| Acro        | 2019-nCoV IgG/IgM Rapid Test                    | Acro Biotech Inc., Rancho Cucamonga, CA, USA                                                                           | RDT    | NCP20030226,<br>NCP20030143, NCP20030100                               | IgM and IgG | NA*          | Whole blood, serum, plasma       |
| Autobio     | Anti-SARS-CoV-2 Rapid Test                      | Autobio Diagnostics Co. Ltd, Zhengzhou, China                                                                          | RDT    | 21C22-J01                                                              | IgM and IgG | spike        | Serum, plasma                    |
| Healgen     | COVID-19 IgG/IgM Rapid Test                     | Healgen Scientific Limited Liability Company, Houston, TX, USA / Zhejiang Orient Gene Biotech Co. Ltd, Zhejiang, China | RDT    | 2003242, 2003310                                                       | IgM and IgG | spike S1     | Whole blood, serum, plasma       |
| Nadal       | NADAL COVID-19 IgG/IgM Test                     | Nal von Minden GmbH, Moers, Germany                                                                                    | RDT    | COV20030017                                                            | IgM and IgG | NA*          | Whole blood, serum, plasma       |
| OnSite      | OnSite COVID-19 IgG/IgM Rapid Test              | CTK Biotech Inc., Poway, CA, USA                                                                                       | RDT    | RD1625                                                                 | IgM and IgG | spike S1     | Whole blood, serum, plasma       |
| Abbott      | Architect SARS-CoV-2 IgG                        | Abbott, Chicago, IL, USA                                                                                               | CMIA   | 18510FN00                                                              | IgG         | N            | Serum, plasma                    |
| Epitope     | EDI Novel coronavirus COVID-19 IgG ELISA        | Epitope Diagnostics Inc., San Diego, CA, USA                                                                           | ELISA  | P738C, P679U                                                           | IgG         | N            | Serum                            |
| Euroimmun   | Anti-SARS-CoV-2 ELISA (IgG)                     | Euroimmun, Lübeck, Germany                                                                                             | ELISA  | E200414BG, E200416AE,<br>E200420AW, E200428BI,<br>E200407AV, E200429AG | IgG         | spike S1     | Serum, plasma                    |
| In-house RV | In-house Region Västerbotten                    | (23)                                                                                                                   | ELISA  | NA                                                                     | IgG         | spike        | Heat-inactivated plasma or serum |
| Mabtech     | Mabtech SARS-CoV-2 Spike S1-RBD Ig Bridge ELISA | MabTech AB, Stockholm, Sweden                                                                                          | ELISA  | NA                                                                     | Ig          | spike S1-RBD | Serum, plasma                    |
| Wantai      | Wantai SARS-CoV-2 Ab ELISA                      | Beijing Wantai Biological Pharmacy Enterprise Co., Ltd., Beijing, China                                                | ELISA  | NCOA20200401                                                           | Ig          | RBD          | Serum, plasma                    |

RDT, rapid diagnostic test; CMIA, chemiluminescent microparticle immunoassay; N, nucleocapsid protein; NA, not available; RBD, receptor-binding domain.

\*not specified in the manufacturer's instructions

**Table S2.** Number of inconclusive rapid diagnostic test IgG-results.

| Rapid diagnostic test | Positive samples<br>(N = 87) |      | Negative samples<br>(N = 96) |     |
|-----------------------|------------------------------|------|------------------------------|-----|
|                       | n                            | %    | n                            | %   |
| Acro                  | 7                            | 8.0  | 1                            | 1.0 |
| Autobio               | 11                           | 12.6 | 1                            | 1.0 |
| Healgen               | 7                            | 8.0  | 0                            |     |
| Nadal                 | 8                            | 9.2  | 0                            |     |
| OnSite                | 3                            | 3.4  | 1                            | 1.0 |

**Table S3.** Rapid diagnostic test IgG-results reported by two laboratory technicians.

|            |              | Operator 2 |          |              |
|------------|--------------|------------|----------|--------------|
|            |              | Negative   | Positive | Inconclusive |
| Operator 1 | Negative     | 576        | 0        | 2            |
|            | Positive     | 0          | 296      | 5            |
|            | Inconclusive | 3          | 0        | 33           |

**Table S4.** Samples testing false positive in platform-based antibody tests.

| Platform-based assay | Healthy donors<br>n/N | Persons seeking medical care<br>n/N | Patients with infectious diseases |                   |                 |
|----------------------|-----------------------|-------------------------------------|-----------------------------------|-------------------|-----------------|
|                      |                       |                                     | Bacteria<br>n/N                   | Virus<br>n/N      | Parasite<br>n/N |
| Abbott               | 0/19                  | 0/79                                | 0/3                               | 0/14 <sup>†</sup> | NA              |
| Epitope*             | 7/35                  | 70/164                              | 5/32                              | 4/40              | 1/7             |
| Euroimmun*           | 0/35                  | 1/164                               | 1/32                              | 0/40              | 0/7             |
| In-house RV          | 0/35                  | 2/164                               | 0/32                              | 0/40              | 0/7             |
| Mabtech              | 0/35                  | 0/164                               | 0/32                              | 0/40              | 0/7             |
| Wantai*              | 0/35                  | 1/164                               | 0/32                              | 0/24 <sup>†</sup> | 0/5             |

NA, not analyzed

\* A borderline outcome was considered a negative result.

<sup>†</sup>Samples from patients infected with seasonal coronaviruses were not available due to limitations in sample volumes.

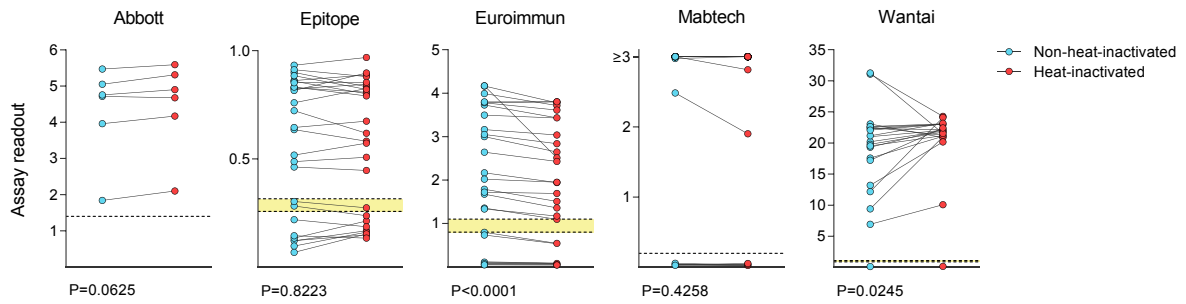

**Figure S1.** Effect of sample heat-inactivation on assay readout. Epitope, Euroimmun, Mabtech, and Wantai were evaluated using non-heat-inactivated (white dots) and heat-inactivated (grey dots) aliquots of 6 negative and 21 positive samples and Abbott using 6 positive samples. Dotted lines correspond to the cutoff and the yellow area shows the borderline interval specified by the manufacturer. Differences in readout-values between non-heat-inactivated and heat-inactivated sample aliquots were analyzed using Wilcoxon matched-pairs signed rank test.

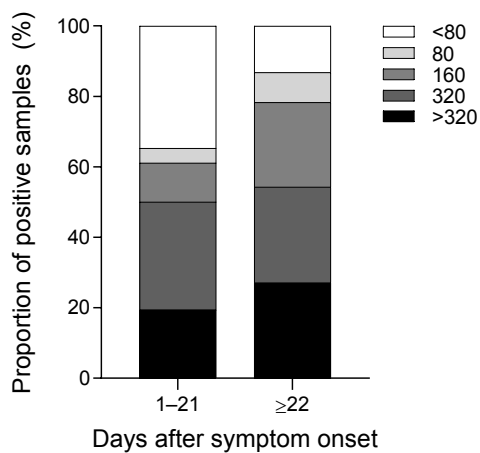

**Figure S2.** Distribution of IgG titers among samples collected 1–21 and  $\geq 22$  days after symptom onset. The IgG titer was determined by using an in-house immunofluorescence assay. The two time-intervals, 1–21 and  $\geq 22$  days after symptom onset, are represented by 72 and 129 samples, respectively.

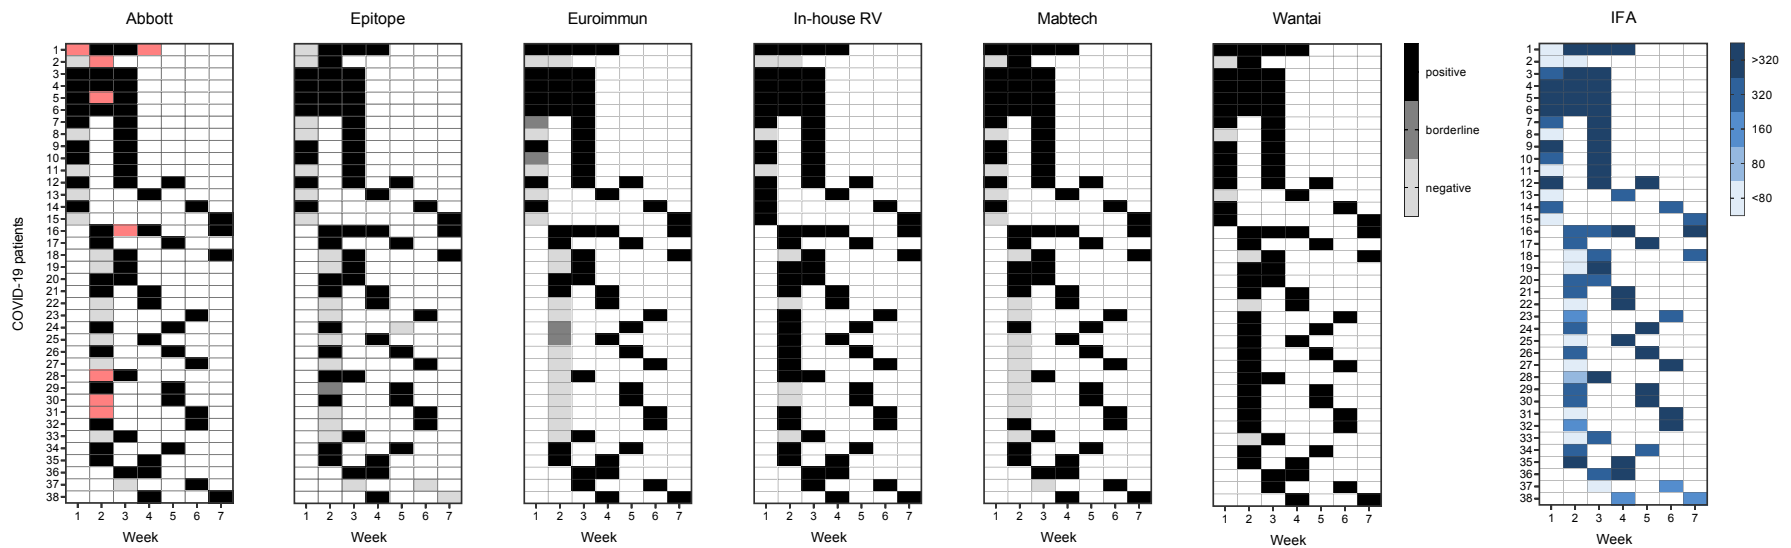

**Figure S3.** Performance of platform-based antibody tests using consecutively collected samples from 38 COVID-19 patients. The samples were collected during week 1-7 after onset of symptom and were titrated and analyzed for anti-SARS-CoV-2 IgG antibodies using an in-house immunofluorescence assay (IFA). Each row represents one patient. Due to a limitation in sample volumes, Abbott was evaluated using a subset of the samples and the red cells represent missing sample.
